# Supplementary material for: Pharmacokinetics of ivermectin metabolites and their activity against Anopheles stephensi mosquitoes
Source: Springer Nature journal article supplement (doi:10.1186/s12936-023-04624-0), 2023-06-24

## Supplements

### List of supplementary figures and tables:

|           |                                                                                                                                                                           |
|-----------|---------------------------------------------------------------------------------------------------------------------------------------------------------------------------|
| Table S1  | Specific tandem mass spectrometry settings applied for the detection and quantification of ivermectin and its metabolites.                                                |
| Table S2  | Dual binary gradient flow program used for metabolism and fractioning assays.                                                                                             |
| Table S3  | Dual binary gradient flow program used for metabolism assays.                                                                                                             |
| Figure S1 | Chromatogram before/after fractioning of the ivermectin metabolites.                                                                                                      |
| Table S4  | Ivermectin metabolite composition (M1-M9) of each fraction (F1-F9).                                                                                                       |
| Table S5  | Comparison of ivermectin metabolite C <sub>max</sub> pharmacokinetic levels with spiked blank blood samples.                                                              |
| Figure S2 | Screening for ivermectin metabolites effect on mosquito activity.                                                                                                         |
| Figure S3 | Fit of the nonlinear model to calculate IVM, M1 and M2 LC <sub>50</sub> .                                                                                                 |
| Figure S4 | Compound level above LC <sub>50</sub> in whole blood for ivermectin (IVM), desmethyl-H <sub>2</sub> B <sub>1a</sub> (M1) and hydroxy-H <sub>2</sub> B <sub>1a</sub> (M2). |

**Table S1 – Specific tandem mass spectrometry settings applied for the detection and quantification of ivermectin and its metabolites.**

| Analyte                                                   | Q1 Mass [Da] | Q3 Mass [Da] | Dwell Time [ms] | DP [V] | EP [V] | CE [V] | CXP [V] |
|-----------------------------------------------------------|--------------|--------------|-----------------|--------|--------|--------|---------|
| Ivermectin I                                              | 892.4        | 569.2        | 10              | 106    | 10     | 17     | 30      |
| Ivermectin II                                             | 892.4        | 307.1        | 10              | 106    | 10     | 31     | 20      |
| Ivermectin-d <sub>2</sub> I                               | 894.4        | 571.3        | 10              | 131    | 10     | 17     | 30      |
| Ivermectin-d <sub>2</sub> II                              | 894.4        | 309.2        | 10              | 131    | 10     | 29     | 26      |
| M1: desmethyl-H <sub>2</sub> B <sub>1a</sub>              | 878.0        | 307.1        | 10              | 106    | 10     | 31     | 20      |
| M2: hydroxy-H <sub>2</sub> B <sub>1a</sub>                | 908.0        | 307.1        | 10              | 106    | 10     | 31     | 20      |
| M3: hydroxy-H <sub>2</sub> B <sub>1a</sub>                | 908.0        | 323.0        | 10              | 106    | 10     | 31     | 20      |
| M4: desmethyl, hydroxy-H <sub>2</sub> B <sub>1a</sub>     | 894.0        | 307.0        | 10              | 106    | 10     | 31     | 20      |
| M5: hydroxy-H <sub>2</sub> B <sub>1a</sub> monosaccharide | 764.0        | 307.0        | 10              | 106    | 10     | 31     | 20      |
| M6: desmethyl, hydroxy-H <sub>2</sub> B <sub>1a</sub>     | 894.0        | 323.0        | 10              | 106    | 10     | 31     | 20      |
| M7: hydroxy-H <sub>2</sub> B <sub>1a</sub> monosaccharide | 764.0        | 323.0        | 10              | 106    | 10     | 31     | 20      |
| M8: dihydroxy-H <sub>2</sub> B <sub>1a</sub>              | 924.0        | 323.0        | 10              | 106    | 10     | 31     | 20      |
| M9: hydroxy-H <sub>2</sub> B <sub>1a</sub>                | 908.1        | 323.0        | 10              | 106    | 10     | 31     | 20      |

H<sub>2</sub>B<sub>1a</sub>: ivermectin, mass filters (Q1 and Q3), Da: Daltons, ms: milliseconds, V: volts, DP: declustering potential, EP: entrance potential, CE: collision energy, CXP: Collision Cell Exit Potential.

**Table S2 – Dual binary gradient flow program used for metabolism and fractioning assays.**

Sample was loaded onto the analytical column using 2% mobile phase B. The initial total flow 1 and 3 was 0.1 mL/min (pump A and B) and 0.5 mL/min (pump C and D), respectively. Samples were diluted with mobile phase A within a T-union installed in front of the analytical column by pump C (total flow 3).

| Time [min] | HPLC Module | Event        | Parameter  |
|------------|-------------|--------------|------------|
| 0.50       | Pumps       | Pump B Conc. | 2%         |
| 0.50       | Pumps       | Total Flow 1 | 0.6 mL/min |
| 0.50       | Pumps       | Total Flow 3 | 0 mL/min   |
| 1.50       | Pumps       | Pump B Conc. | 70%        |
| 2.00       | Oven        | Right Valve  | 0          |
| 9.00       | Pumps       | Pump B Conc. | 87%        |
| 9.01       | Pumps       | Pump B Conc. | 95%        |
| 9.50       | Oven        | Right Valve  | 1          |
| 11.50      | Pumps       | Pump B Conc. | 95%        |
| 11.51      | Pumps       | Pump B Conc. | 2%         |
| 12.00      | Controller  | Stop         |            |

Pump B Conc.: Concentration of mobile phase B delivered by pump A and B.

Total Flow 1: Flow of pump A and B.

Total Flow 3: Flow of pump C and D.

For metabolism assays, the HPLC flow was directed into the MS (right valve: position 0) between 2.0 – 9.5 min, otherwise directed into the solvent waste (right valve: position 1).

**Table S3 – Dual binary gradient flow program used for pharmacokinetic assays.**

Sample was loaded onto the analytical column using 2% mobile phase B. The initial total flow 1 and 3 was 0.1 mL/min (pump A and B) and 0.5 mL/min (pump C and D), respectively. Samples were online diluted with 2% mobile phase B (98% mobile phase A) within a T-union installed in front of the analytical column.

| Time [min] | HPLC Module | Event        | Parameter  |
|------------|-------------|--------------|------------|
| 0.50       | Pumps       | Pump B Conc. | 2 %        |
| 0.50       | Pumps       | Total Flow 1 | 0.6 mL/min |
| 0.50       | Pumps       | Total Flow 3 | 0 mL/min   |
| 1.00       | Pumps       | Pump B Conc. | 60 %       |
| 2.50       | Oven        | Right Valve  | 0          |
| 5.00       | Pumps       | Pump B Conc. | 82 %       |
| 5.25       | Pumps       | Pump B Conc. | 95 %       |
| 5.50       | Oven        | Right Valve  | 1          |
| 6.00       | Pumps       | Pump B Conc. | 95 %       |
| 6.01       | Pumps       | Pump B Conc. | 2 %        |
| 6.50       | Controller  | Stop         |            |

Pump B Conc.: Concentration of mobile phase B delivered by pump A and B.

Total Flow 1: Flow of pump A and B.

Total Flow 3: Flow of pump C and D.

The HPLC flow was directed into the MS (right valve: position 0) between 2.5 – 5.5 min, otherwise directed into the solvent waste (right valve: position 1).

**Figure S1 – Chromatogram before/after fractionating of the ivermectin metabolites.**

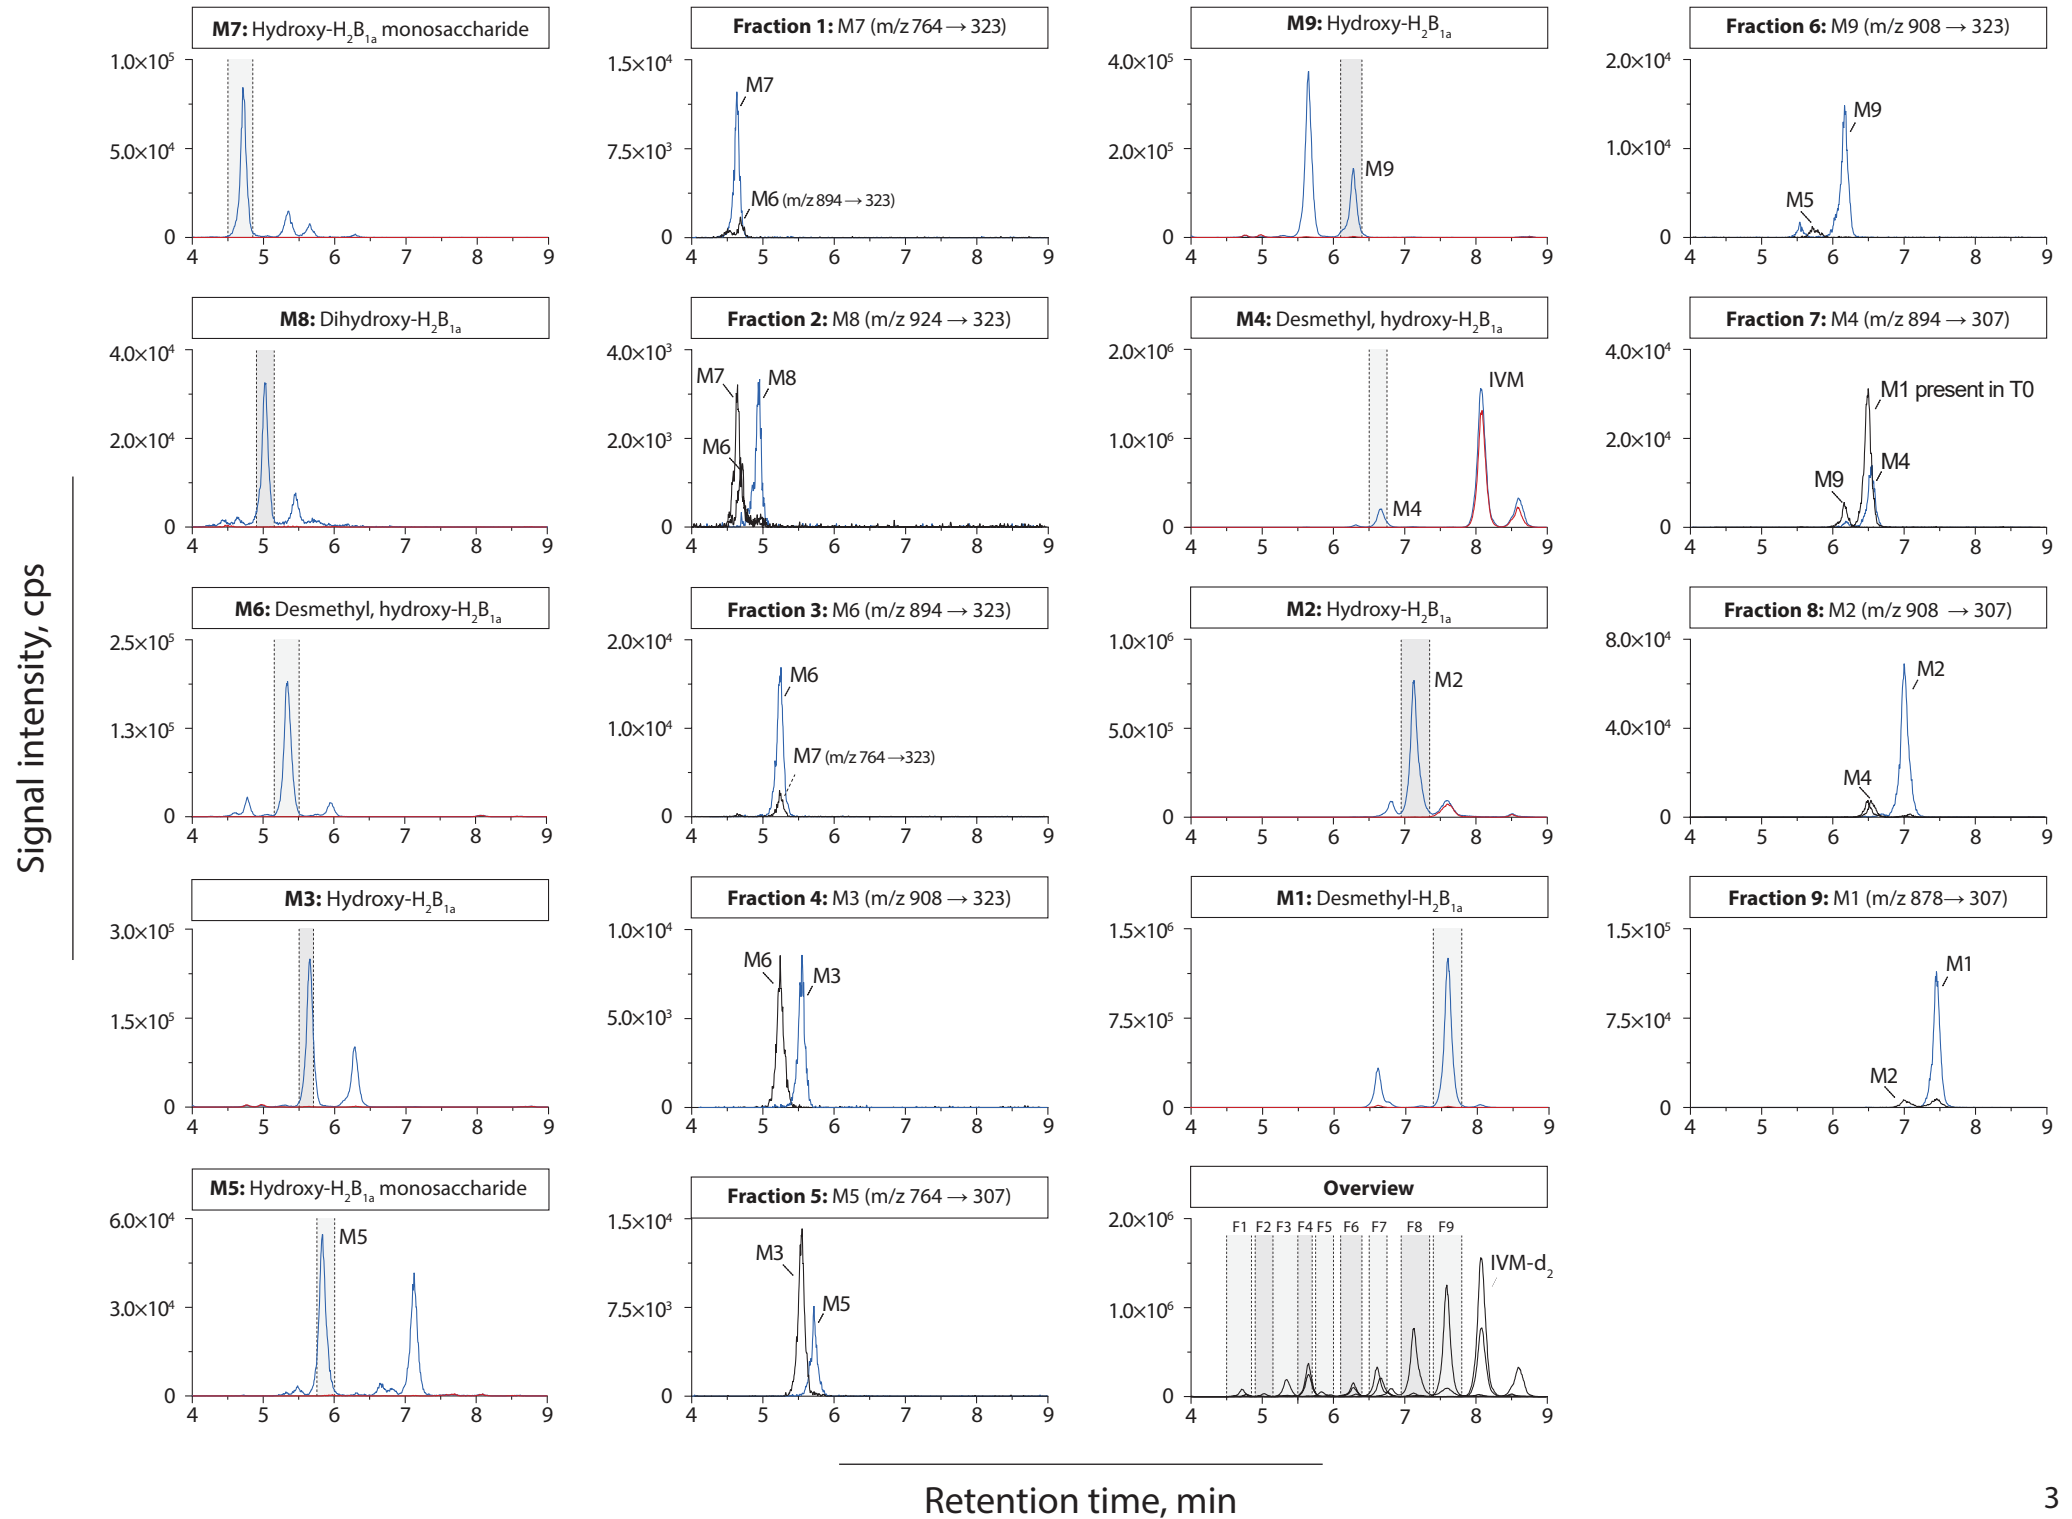

**Table S4 – Ivermectin metabolite composition (M1-M9) of each fraction (F1-F9).**

Numbers indicate the mean peak area (n=4) in percentage to the largest observed signal of the same metabolite. The standard deviation is given in parentheses. Values under 10% are not included. Bold numbers indicate which metabolite was considered for each fraction (e.g. 100% of M9 in fraction 6 [F6]).

|                            | M7, %         | M8, %         | M6, %         | M3, %                     | M5, %         | M9, %         | M4, %         | M2, %         | M1, %      |
|----------------------------|---------------|---------------|---------------|---------------------------|---------------|---------------|---------------|---------------|------------|
| <b>F1:</b> 4.50 – 4.85 min | <b>100</b>    |               |               |                           |               |               |               |               |            |
| <b>F2:</b> 4.90 – 5.15 min | 24.4<br>(5.4) | <b>100</b>    |               |                           |               |               |               |               |            |
| <b>F3:</b> 5.15 – 5.50 min |               | 21.1<br>(4.4) | <b>100</b>    |                           |               |               |               |               |            |
| <b>F4:</b> 5.50 – 5.70 min |               |               | 40.4<br>(6.5) | <b>66</b><br><b>(5.3)</b> |               |               |               |               |            |
| <b>F5:</b> 5.75 – 6.00 min |               |               |               | 100                       | <b>100</b>    |               |               |               |            |
| <b>F6:</b> 6.10 – 6.40 min |               |               |               |                           | 29.3<br>(5.7) | <b>100</b>    |               |               |            |
| <b>F7:</b> 6.50 – 6.75 min |               |               |               |                           |               | 28.9<br>(2.7) | <b>100</b>    |               |            |
| <b>F8:</b> 6.95 – 7.35 min |               |               |               |                           | 10.2<br>(2.2) |               | 70.3<br>(9.9) | <b>100</b>    |            |
| <b>F9:</b> 7.40 – 7.80 min |               |               |               |                           |               |               |               | 13.3<br>(1.3) | <b>100</b> |

Ivermectin (H<sub>2</sub>B<sub>1a</sub>) metabolites: **M1:** Desmethyl-H<sub>2</sub>B<sub>1a</sub>, **M2:** Hydroxy-H<sub>2</sub>B<sub>1a</sub>, **M3:** Hydroxy-H<sub>2</sub>B<sub>1a</sub>, **M4:** Desmethyl, hydroxy-H<sub>2</sub>B<sub>1a</sub>, **M5:** Hydroxy-H<sub>2</sub>B<sub>1a</sub> monosaccharide, **M6:** Desmethyl, hydroxy-H<sub>2</sub>B<sub>1a</sub>, **M7:** Hydroxy-H<sub>2</sub>B<sub>1a</sub> monosaccharide, **M8:** Dihydroxy-H<sub>2</sub>B<sub>1a</sub>, **M9:** Hydroxy-H<sub>2</sub>B<sub>1a</sub>.

**Table S5a-c – Comparison of ivermectin metabolite C<sub>max</sub> pharmacokinetic levels with spiked blank blood samples.**

Maximal analyte peak area of metabolite 1-9 (M1-M9) measured for PK subject 1-12 in 50 µL blood. An aliquot of 50 µL blank blood of PK subject 2, 4, and 6 was spiked with 10 µL of metabolite fraction (F1: M7, F2: M8, F3: M6, F4: M3, F5: M5, F6: M9, F7: M4, F8: M2, F9: M1). The mean peak area of the spiked blood samples was compared with the mean area of the C<sub>max</sub> samples to calculate the volume of metabolite fraction required to obtain equal values.

**Table S5a – Data of ivermectin metabolites M1-M3**

| PK Subject ID                              | Observed C <sub>max</sub><br>of M1 | M1 spiked to<br>blank blood | Observed C <sub>max</sub><br>of M2 | M2 spiked to<br>blank blood | Observed C <sub>max</sub><br>of M3 | M3 spiked to<br>blank blood |
|--------------------------------------------|------------------------------------|-----------------------------|------------------------------------|-----------------------------|------------------------------------|-----------------------------|
|                                            | Peak area (counts)                 | Peak area (counts)          | Peak area (counts)                 | Peak area (counts)          | Peak area (counts)                 | Peak area (counts)          |
| 1                                          | 1.95E+04                           |                             | 1.84E+04                           |                             | 6.21E+03                           |                             |
| 2                                          | 1.01E+04                           | 5.07E+04                    | 9.36E+03                           | 3.57E+04                    | 3.33E+03                           | 2.97E+03                    |
| 3                                          | 1.39E+04                           |                             | 1.31E+04                           |                             | 4.98E+03                           |                             |
| 4                                          | 8.48E+03                           | 6.10E+04                    | 7.42E+03                           | 4.78E+04                    | 2.70E+03                           | 3.46E+03                    |
| 5                                          | 9.52E+03                           |                             | 9.63E+03                           |                             | 3.63E+03                           |                             |
| 6                                          | 2.33E+04                           | 7.58E+04                    | 2.00E+04                           | 3.11E+04                    | 5.52E+03                           | 3.35E+03                    |
| 7                                          | 1.56E+04                           |                             | 1.39E+04                           |                             | 4.44E+03                           |                             |
| 8                                          | 1.79E+04                           |                             | 1.25E+04                           |                             | 4.04E+03                           |                             |
| 9                                          | 1.28E+04                           |                             | 1.08E+04                           |                             | 3.41E+03                           |                             |
| 10                                         | 1.60E+04                           |                             | 1.50E+04                           |                             | 4.42E+03                           |                             |
| 11                                         | 2.28E+04                           |                             | 1.64E+04                           |                             | 4.22E+03                           |                             |
| 12                                         | 1.78E+04                           |                             | 1.59E+04                           |                             | 4.51E+03                           |                             |
| Mean                                       | 1.56E+04                           | 6.25E+04                    | 1.35E+04                           | 3.82E+04                    | 4.28E+03                           | 3.26E+03                    |
| Difference spiked blood / C <sub>max</sub> |                                    | 4.0                         |                                    | 2.8                         |                                    | 0.8                         |
| Vol. of fraction required for 50 µL blood  |                                    | 2.5                         |                                    | 3.5                         |                                    | 13.1                        |
| Vol. of fraction required for 3 mL blood   |                                    | <b>150</b>                  |                                    | <b>212</b>                  |                                    | <b>788</b>                  |

Ivermectin (H<sub>2</sub>B<sub>1a</sub>) metabolites: **M1**: Desmethyl-H<sub>2</sub>B<sub>1a</sub>, **M2**: Hydroxy-H<sub>2</sub>B<sub>1a</sub>, **M3**: Hydroxy-H<sub>2</sub>B<sub>1a</sub>, **M4**: Desmethyl, hydroxy-H<sub>2</sub>B<sub>1a</sub>, **M5**: Hydroxy-H<sub>2</sub>B<sub>1a</sub> monosaccharide, **M6**: Desmethyl, hydroxy-H<sub>2</sub>B<sub>1a</sub>, **M7**: Hydroxy-H<sub>2</sub>B<sub>1a</sub> monosaccharide, **M8**: Dihydroxy-H<sub>2</sub>B<sub>1a</sub>, **M9**: Hydroxy-H<sub>2</sub>B<sub>1a</sub>.

**Table S5b – Data of ivermectin metabolites M4-M6.**

| PK Subject ID                              | Observed C <sub>max</sub><br>of M4 | M4 spiked to<br>blank blood | Observed C <sub>max</sub><br>of M5 | M5 spiked to<br>blank blood | Observed C <sub>max</sub><br>of M6 | M6 spiked to<br>blank blood |
|--------------------------------------------|------------------------------------|-----------------------------|------------------------------------|-----------------------------|------------------------------------|-----------------------------|
|                                            | Peak area (counts)                 | Peak area (counts)          | Peak area (counts)                 | Peak area (counts)          | Peak area (counts)                 | Peak area (counts)          |
| 1                                          | 6.13E+03                           |                             | 7.86E+02                           |                             | 3.04E+03                           |                             |
| 2                                          | 4.65E+03                           | 8.84E+03                    | 5.85E+02                           | 2.73E+03                    | 1.56E+03                           | 1.03E+04                    |
| 3                                          | 5.03E+03                           |                             | 1.01E+03                           |                             | 2.10E+03                           |                             |
| 4                                          | 4.08E+03                           | 1.01E+04                    | 7.22E+02                           | 3.40E+03                    | 1.60E+03                           | 6.99E+03                    |
| 5                                          | 2.43E+03                           |                             | 6.06E+02                           |                             | 1.15E+03                           |                             |
| 6                                          | 7.98E+03                           | 5.39E+03                    | 1.25E+03                           | 3.27E+03                    | 3.23E+03                           | 7.74E+03                    |
| 7                                          | 4.09E+03                           |                             | 8.58E+02                           |                             | 1.62E+03                           |                             |
| 8                                          | 5.21E+03                           |                             | 6.84E+02                           |                             | 1.82E+03                           |                             |
| 9                                          | 4.12E+03                           |                             | 6.59E+02                           |                             | 1.80E+03                           |                             |
| 10                                         | 5.38E+03                           |                             | 7.23E+02                           |                             | 1.99E+03                           |                             |
| 11                                         | 5.67E+03                           |                             | 8.95E+02                           |                             | 2.12E+03                           |                             |
| 12                                         | 5.92E+03                           |                             | 7.29E+02                           |                             | 2.69E+03                           |                             |
| Mean                                       | 5.06E+03                           | 8.11E+03                    | 7.92E+02                           | 3.13E+03                    | 2.06E+03                           | 8.33E+03                    |
| Difference spiked blood / C <sub>max</sub> |                                    | 1.6                         |                                    | 4.0                         |                                    | 4.0                         |
| Vol. of fraction required for 50 µL blood  |                                    | 6.2                         |                                    | 2.5                         |                                    | 2.5                         |
| Vol. of fraction required for 3 mL blood   |                                    | <b>374*</b>                 |                                    | <b>152</b>                  |                                    | <b>148</b>                  |

Ivermectin (H<sub>2</sub>B<sub>1a</sub>) metabolites: **M4**: Desmethyl, hydroxy-H<sub>2</sub>B<sub>1a</sub>, **M5**: Hydroxy-H<sub>2</sub>B<sub>1a</sub> monosaccharide, **M6**: Desmethyl, hydroxy-H<sub>2</sub>B<sub>1a</sub>,

**Table S5c – Data of ivermectin metabolites M7-M9.**

| PK Subject ID                              | Observed C <sub>max</sub> of M7 | M7 spiked to blank blood | Observed C <sub>max</sub> of M8 | M8 spiked to blank blood | Observed C <sub>max</sub> of M9 | M9 spiked to blank blood |
|--------------------------------------------|---------------------------------|--------------------------|---------------------------------|--------------------------|---------------------------------|--------------------------|
|                                            | Peak area (counts)              | Peak area (counts)       | Peak area (counts)              | Peak area (counts)       | Peak area (counts)              | Peak area (counts)       |
| 1                                          | 1.31E+03                        |                          | 7.02E+02                        |                          | N/A                             |                          |
| 2                                          | 7.70E+02                        | 5.49E+03                 | 5.34E+02                        | 2.05E+03                 | N/A                             | 1.09E+04                 |
| 3                                          | 9.70E+02                        |                          | 4.91E+02                        |                          | N/A                             |                          |
| 4                                          | 7.68E+02                        | 6.70E+03                 | 3.41E+02                        | 1.37E+03                 | N/A                             | 1.24E+04                 |
| 5                                          | 8.12E+02                        |                          | 3.43E+02                        |                          | N/A                             |                          |
| 6                                          | 1.39E+03                        | 4.86E+03                 | 6.41E+02                        | 1.54E+03                 | N/A                             | 1.08E+04                 |
| 7                                          | 1.26E+03                        |                          | 3.42E+02                        |                          | N/A                             |                          |
| 8                                          | 1.09E+03                        |                          | 4.91E+02                        |                          | N/A                             |                          |
| 9                                          | 7.88E+02                        |                          | 4.29E+02                        |                          | N/A                             |                          |
| 10                                         | 9.63E+02                        |                          | 4.93E+02                        |                          | N/A                             |                          |
| 11                                         | 1.21E+03                        |                          | 2.79E+02                        |                          | N/A                             |                          |
| 12                                         | 9.57E+02                        |                          | 4.55E+02                        |                          | N/A                             |                          |
| Mean                                       | 1.02E+03                        | 5.68E+03                 | 4.62E+02                        | 1.65E+03                 | N/A                             | 1.14E+04                 |
| Difference spiked blood / C <sub>max</sub> |                                 | 5.5                      |                                 | 3.6                      |                                 | N/A                      |
| Vol. of fraction required for 50 µL blood  |                                 | 1.8                      |                                 | 2.8                      |                                 | N/A                      |
| Vol. of fraction required for 3 mL blood   |                                 | <b>108</b>               |                                 | <b>168</b>               |                                 | <b>120*</b>              |

Ivermectin (H<sub>2</sub>B<sub>1a</sub>) metabolites: **M7**: Hydroxy-H<sub>2</sub>B<sub>1a</sub> monosaccharide, **M8**: Dihydroxy-H<sub>2</sub>B<sub>1a</sub>, **M9**: Hydroxy-H<sub>2</sub>B<sub>1a</sub>.

**Figure S2 – Screening for ivermectin metabolites effect on mosquito activity.**

*Anopheles stephensi* mosquitoes were treated with blank human blood (**blank**), or blood containing either ivermectin (**IVM**, 50 ng/mL), or an ivermectin metabolite (M1-M9): **M1**: Desmethyl-H<sub>2</sub>B<sub>1a</sub>, **M2**: Hydroxy-H<sub>2</sub>B<sub>1a</sub>, **M3**: Hydroxy-H<sub>2</sub>B<sub>1a</sub>, **M4**: Desmethyl, hydroxy-H<sub>2</sub>B<sub>1a</sub>, **M5**: Hydroxy-H<sub>2</sub>B<sub>1a</sub> monosaccharide, **M6**: Desmethyl, hydroxy-H<sub>2</sub>B<sub>1a</sub>, **M7**: Hydroxy-H<sub>2</sub>B<sub>1a</sub> monosaccharide, **M8**: Dihydroxy-H<sub>2</sub>B<sub>1a</sub>, **M9**: Hydroxy-H<sub>2</sub>B<sub>1a</sub>.

Three batches of mosquitoes, with an average of 26 mosquitoes/condition, were used per treatment group. Mean mosquito activity was assessed after 24h, 48h and 72h. Error bars correspond to the range. Mosquito's activity score: +2: The mosquito can fly and reach the top of the cup, it stays mainly on the top of the cup; +1: The mosquito is staying on the bottom of the cup, it is not able to fly but maybe can cover short distances on the ground; 0: No movements observed upon physical contact, the mosquito is classified as dead.

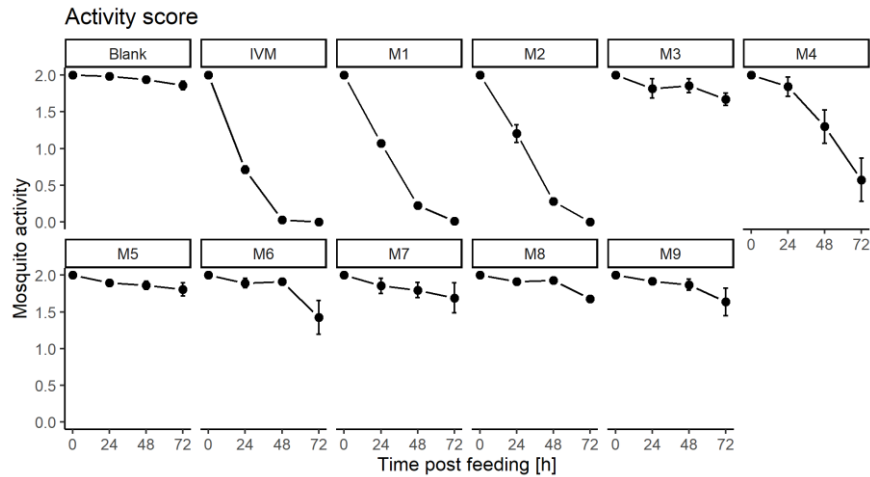

| IVM metabolite | Time post feeding [h] | Average activity score | SE   | IVM metabolite | Time post feeding [h] | Average activity score | SE   |
|----------------|-----------------------|------------------------|------|----------------|-----------------------|------------------------|------|
| IVM            | 0                     | 2.00                   | 0.00 | M5             | 0                     | 2.00                   | 0.00 |
| IVM            | 24                    | 0.71                   | 0.05 | M5             | 24                    | 1.90                   | 0.01 |
| IVM            | 48                    | 0.03                   | 0.02 | M5             | 48                    | 1.86                   | 0.06 |
| IVM            | 72                    | 0                      | 0.00 | M5             | 72                    | 1.81                   | 0.09 |
| M1             | 0                     | 2.00                   | 0.00 | M6             | 0                     | 2.00                   | 0.00 |
| M1             | 24                    | 1.07                   | 0.04 | M6             | 24                    | 1.89                   | 0.07 |
| M1             | 48                    | 0.23                   | 0.02 | M6             | 48                    | 1.91                   | 0.01 |
| M1             | 72                    | 0.01                   | 0.01 | M6             | 72                    | 1.42                   | 0.23 |
| M2             | 0                     | 2.00                   | 0.00 | M7             | 0                     | 2.00                   | 0.00 |
| M2             | 24                    | 1.20                   | 0.12 | M7             | 24                    | 1.85                   | 0.11 |
| M2             | 48                    | 0.28                   | 0.05 | M7             | 48                    | 1.80                   | 0.10 |
| M2             | 72                    | 0                      | 0.00 | M7             | 72                    | 1.69                   | 0.21 |
| M3             | 0                     | 2.00                   | 0.00 | M8             | 0                     | 2.00                   | 0.00 |
| M3             | 24                    | 1.82                   | 0.13 | M8             | 24                    | 1.91                   | 0.01 |
| M3             | 48                    | 1.86                   | 0.09 | M8             | 48                    | 1.93                   | 0.02 |
| M3             | 72                    | 1.67                   | 0.08 | M8             | 72                    | 1.68                   | 0.04 |
| M4             | 0                     | 2.00                   | 0.00 | M9             | 0                     | 2.00                   | 0.00 |
| M4             | 24                    | 1.84                   | 0.13 | M9             | 24                    | 1.92                   | 0.03 |
| M4             | 48                    | 1.30                   | 0.23 | M9             | 48                    | 1.87                   | 0.08 |
| M4             | 72                    | 0.57                   | 0.29 | M9             | 72                    | 1.64                   | 0.19 |
| blank          | 0                     | 2.00                   | 0.00 |                |                       |                        |      |
| blank          | 24                    | 1.98                   | 0.02 |                |                       |                        |      |
| blank          | 48                    | 1.94                   | 0.04 |                |                       |                        |      |
| blank          | 72                    | 1.86                   | 0.06 |                |                       |                        |      |



**Figure S3 – Fit of the non-linear model to calculate IVM, M1 and M2 LC<sub>50</sub>.**

Multiple doses/concentrations of drug (IVM: ivermectin, M1: Desmethyl-H<sub>2</sub>B<sub>1a</sub>, M2: Hydroxy-H<sub>2</sub>B<sub>1a</sub>) were orally fed to *Anopheles stephensi* mosquitoes to determine the lethal concentration that killed 50% of the mosquitoes (LC<sub>50</sub>) 72h after treatment. The blood samples of the participants of the pharmacokinetics trial (Duthaler et al., 2019) were analyzed to derive the maximal blood level (C<sub>max</sub>) for ivermectin, M1 and M2 (Figure 2). An administration of 12 mg ivermectin yielded a C<sub>max</sub> of 50 ng/mL for ivermectin, therefore LC<sub>50</sub> was evaluated using ivermectin concentrations ranging between 1–12.5 ng/mL. For the metabolites M1 and M2, C<sub>max</sub> corresponds to the maximal intensity (peak area, counts) from the metabolite peak intensity time plots. *Anopheles stephensi* were treated with different dilutions of ivermectin (1/4 C<sub>max</sub>, 1/6 C<sub>max</sub>, 1/10 C<sub>max</sub>, 1/20 C<sub>max</sub>, 1/50 C<sub>max</sub>), M1 (C<sub>max</sub>, 1/2 C<sub>max</sub>, 1/4 C<sub>max</sub>, 1/6 C<sub>max</sub>, 1/10 C<sub>max</sub>) and M2 (C<sub>max</sub>, 1/2 C<sub>max</sub>, 1/3 C<sub>max</sub>, 1/4 C<sub>max</sub>, 1/5 C<sub>max</sub>). The experiment was performed in triplicate, with an average of 24 [8 – 54] mosquitoes per drug dilution and a total number of mosquito fed per drug (n). A plot of the observed mortality versus the dose/concentration fed to the mosquito (black dots) was overlaid with the plot of the confidence bands (grey) around the fitted regression curve (black line). LC<sub>50</sub> summarized in Table 2.

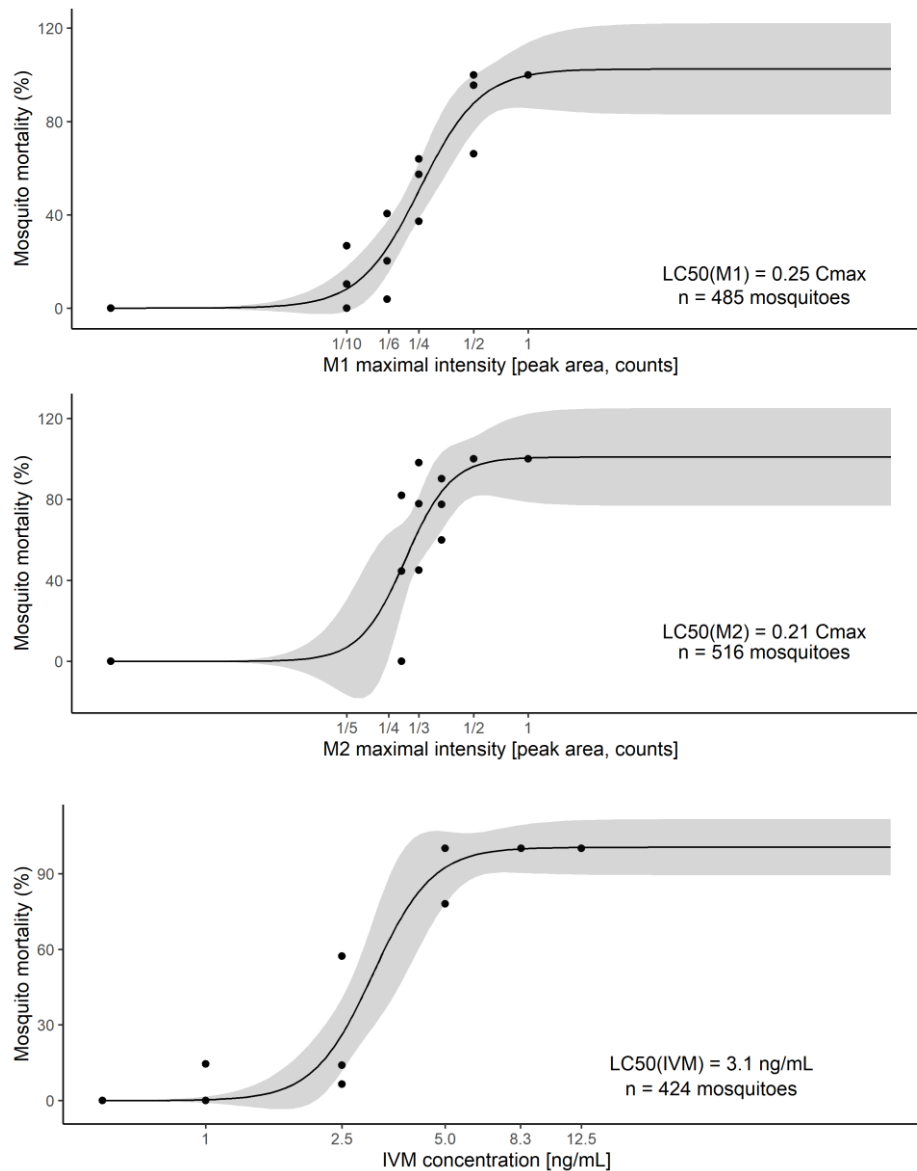

**Figure S4 – Compound level above LC<sub>50</sub> in whole blood for ivermectin (IVM), and metabolites desmethyl-H<sub>2</sub>B<sub>1a</sub> (M1) and hydroxy-H<sub>2</sub>B<sub>1a</sub> (M2).**

The blood samples of the participants of the pharmacokinetics trial (Duthaler et al., 2019), pre- and up to 72h post-ivermectin dose, were analyzed to derive the pharmacokinetic profiles for ivermectin, M1 and M2. The LC<sub>50</sub> values were computed in **Figure S3** and used to derive the time above LC<sub>50</sub>.

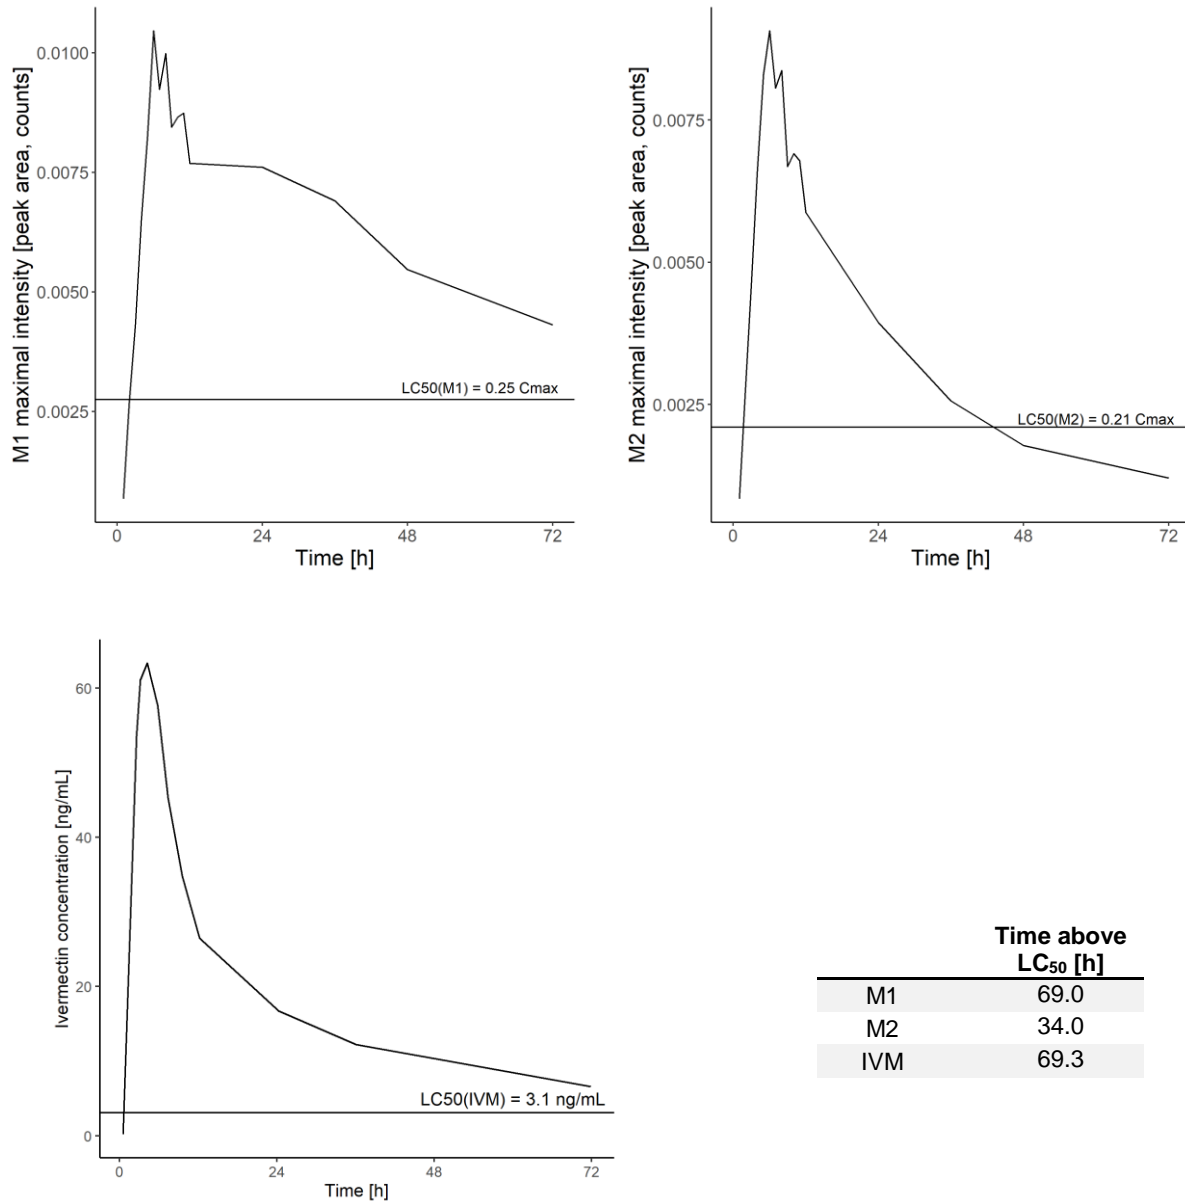

Supplement: MOESM1 [file 25533782]
